# Supplementary material for: Sonochemistry-assisted reversible addition–fragmentation chain transfer polymerization for synthesizing multicolor room-temperature phosphorescent polymers
Source: Royal Society of Chemistry journal article supplement (doi:10.1039/d5py00018a), 2025-01-01
Supplement: d5py00018a1.pdf [file d5py00018a1.pdf]

## Supporting Information

### **Sonochemistry-assisted Reversible Addition- Fragmentation Transfer Polymerization for Multicolor Room-temperature Phosphorescent Polymers**

Wenjing Liu<sup>1‡</sup>, Ruoqing Zhao<sup>1‡</sup>, Jinhong Han<sup>1</sup>, Chen Wang<sup>1</sup>, Xiaoyang Shao<sup>1</sup> and  
Zhenhua Wang<sup>1,2,3\*</sup>

1. State Key Laboratory of Flexible Electronics (LOFE) & Institute of Flexible Electronics (IFE) ,  
Northwestern Polytechnical University, 127 West Youyi Road, Xi'an, 710072, China
2. Shaanxi Key Laboratory of Flexible Electronics, Northwestern Polytechnical University, 127 West  
Youyi Road, Xi'an, 710072, China
3. MIIT Key Laboratory of Flexible Electronics (KLoFE), Northwestern Polytechnical University, 127  
West Youyi Road, Xi'an, 710072, China

E-mail: iamzhwang@nwpu.edu.cn

<sup>‡</sup>Equal contribution

# Table of Contents

|                                                                                                                                                                                      |    |
|--------------------------------------------------------------------------------------------------------------------------------------------------------------------------------------|----|
| Figure S1. Conversion analysis by $^1\text{H-NMR}$ ( $\text{DMSO-d}_6$ ) of the polymerization of PMAA-CTA. ....                                                                     | 3  |
| Figure S2. The GPC trace of PMAA-CTA. ....                                                                                                                                           | 4  |
| Figure S3. The GPC trace of control group. ....                                                                                                                                      | 5  |
| Figure S4. Conversion analysis by $^1\text{H-NMR}$ ( $\text{DMSO-d}_6$ ) of the polymerization of MAA and BA under ultrasound. ....                                                  | 6  |
| Figure S5. Conversion analysis by $^1\text{H-NMR}$ ( $\text{DMSO-d}_6$ ) of the polymerization of MAA and BA under control group. ....                                               | 7  |
| Figure S6. Particle size testing at different ultrasound times. ....                                                                                                                 | 8  |
| Figure S7. Number-average molecular weight and size of ultrasound group. ....                                                                                                        | 9  |
| Figure S8. Photos of RhB/GCP with different doping concentrations under sunlight, UV irradiation, and UV off. ....                                                                   | 10 |
| Figure S9. (a) CIE coordinates of afterglow luminescence of RTP materials with different doping ratios, and (b) phosphorescence spectra. ....                                        | 11 |
| Figure S10. (a) CIE coordinates of afterglow luminescence of RTP materials with different doping ratios, and (b) fluorescence spectra. ....                                          | 12 |
| Figure S11. (a) RTP polymer color palette with different RhB/Fluc doping ratios. (b) RTP polymer solutions with different RhB/Fluc doping ratios (top) and thin films (bottom). .... | 13 |
| Scheme S1. Synthesis of CTA. ....                                                                                                                                                    | 14 |
| Scheme S2. Synthesis of Cz-OH. ....                                                                                                                                                  | 14 |
| Scheme S3. Synthesis of RAFT agents. ....                                                                                                                                            | 14 |
| Scheme S4. Synthesis of GCP. ....                                                                                                                                                    | 15 |
| Figure S12. $^1\text{H-NMR}$ spectrum of the Bis-(dodecyl thioalkyl thiocarbonyl) disulfide in $\text{CDCl}_3$ . ....                                                                | 16 |
| Figure S13. $^1\text{H-NMR}$ spectrum of the CTA in $\text{CDCl}_3$ . ....                                                                                                           | 17 |
| Figure S14. $^{13}\text{C-NMR}$ spectrum of the CTA in $\text{CDCl}_3$ . ....                                                                                                        | 18 |
| Figure S15. $^1\text{H-NMR}$ spectrum of Cz-OH in DMSO. ....                                                                                                                         | 19 |
| Figure S16. $^{13}\text{C-NMR}$ spectrum of Cz-OH in $\text{CDCl}_3$ . ....                                                                                                          | 20 |
| Figure S17. $^1\text{H-NMR}$ spectrum of RAFT agents in DMSO. ....                                                                                                                   | 21 |
| Figure S18. $^{13}\text{C-NMR}$ spectrum of RAFT agents in $\text{CDCl}_3$ . ....                                                                                                    | 22 |
| Figure S19. $^1\text{H-NMR}$ spectrum of PMAA-CTA in DMSO. ....                                                                                                                      | 23 |

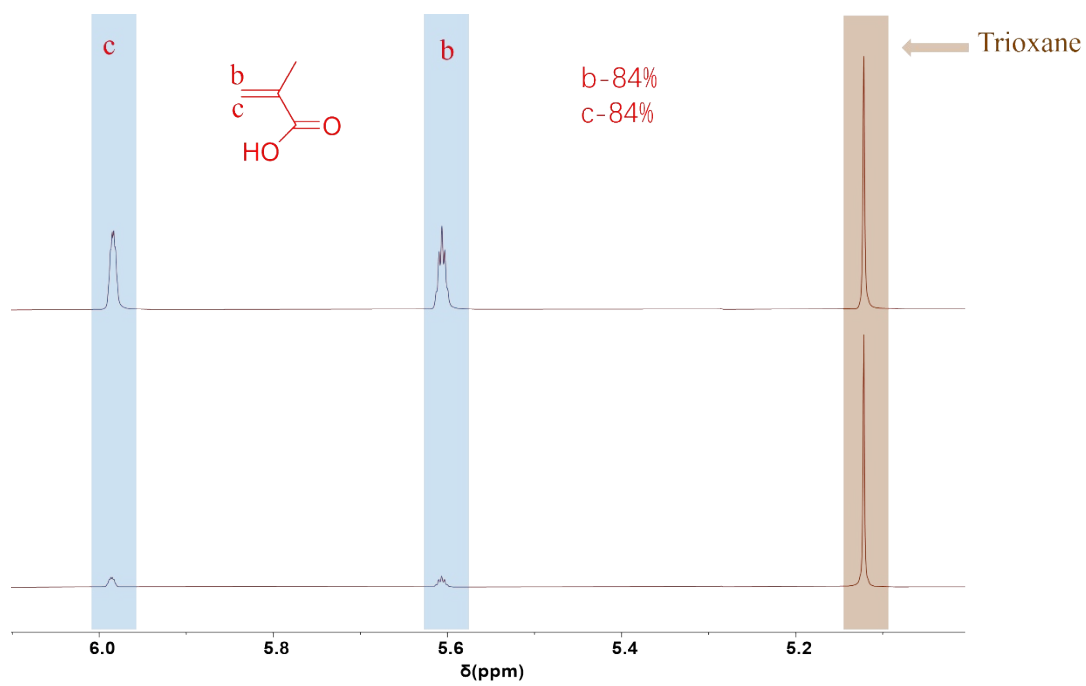

**Figure S1.** Conversion analysis by  $^1\text{H-NMR}$  ( $\text{DMSO-d}_6$ ) of the polymerization of PMAA-CTA.

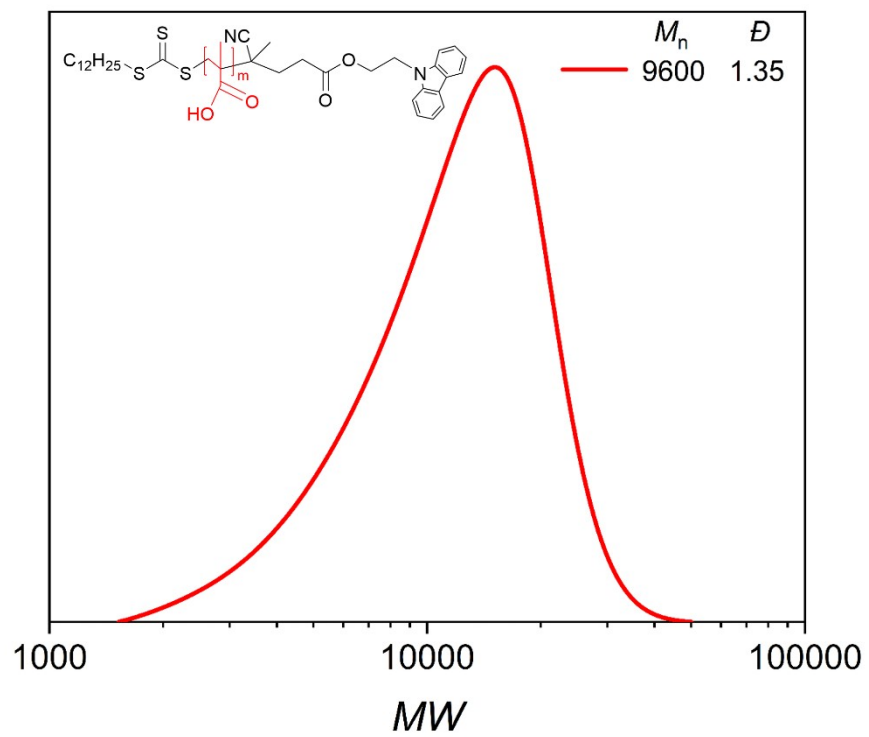

**Figure S2.** The GPC trace of PMAA-CTA.

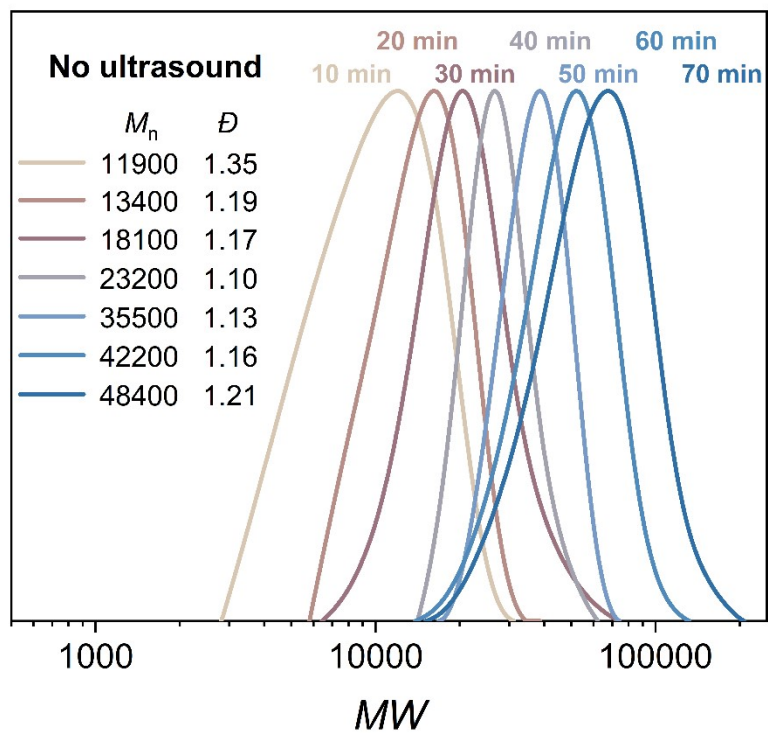

**Figure S3.** The GPC trace of control group.

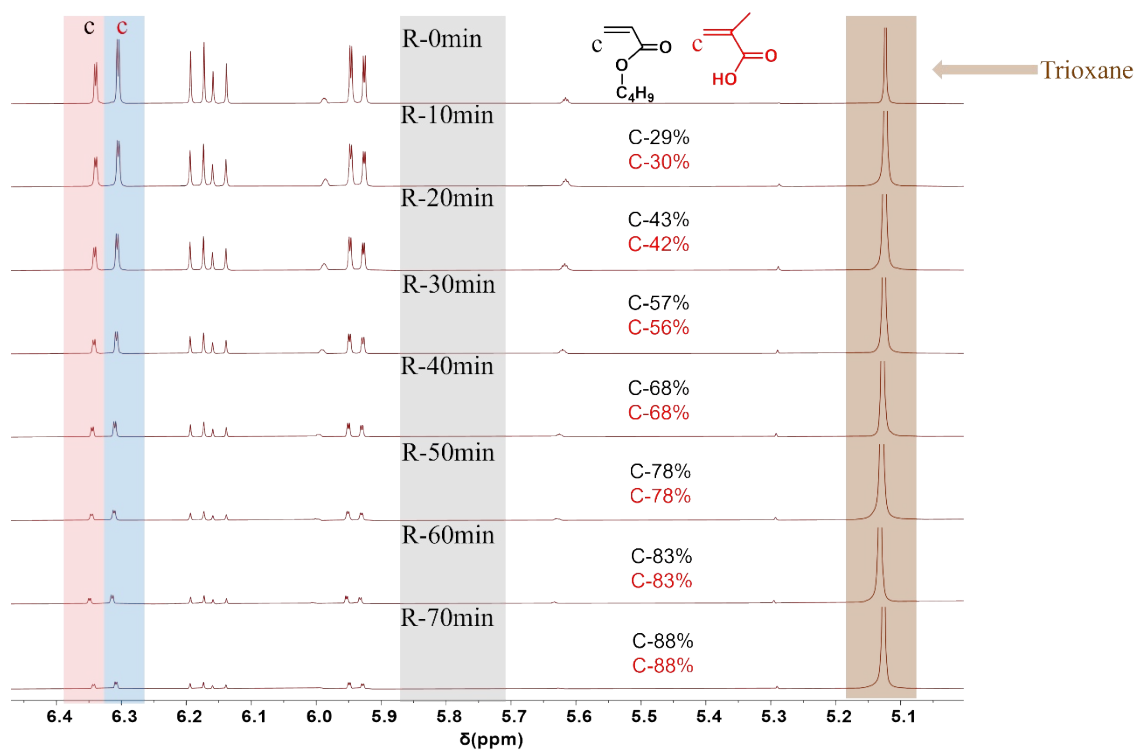

**Figure S4.** Conversion analysis by  $^1\text{H-NMR}$  ( $\text{DMSO-d}_6$ ) of the polymerization of MAA and BA under ultrasound.

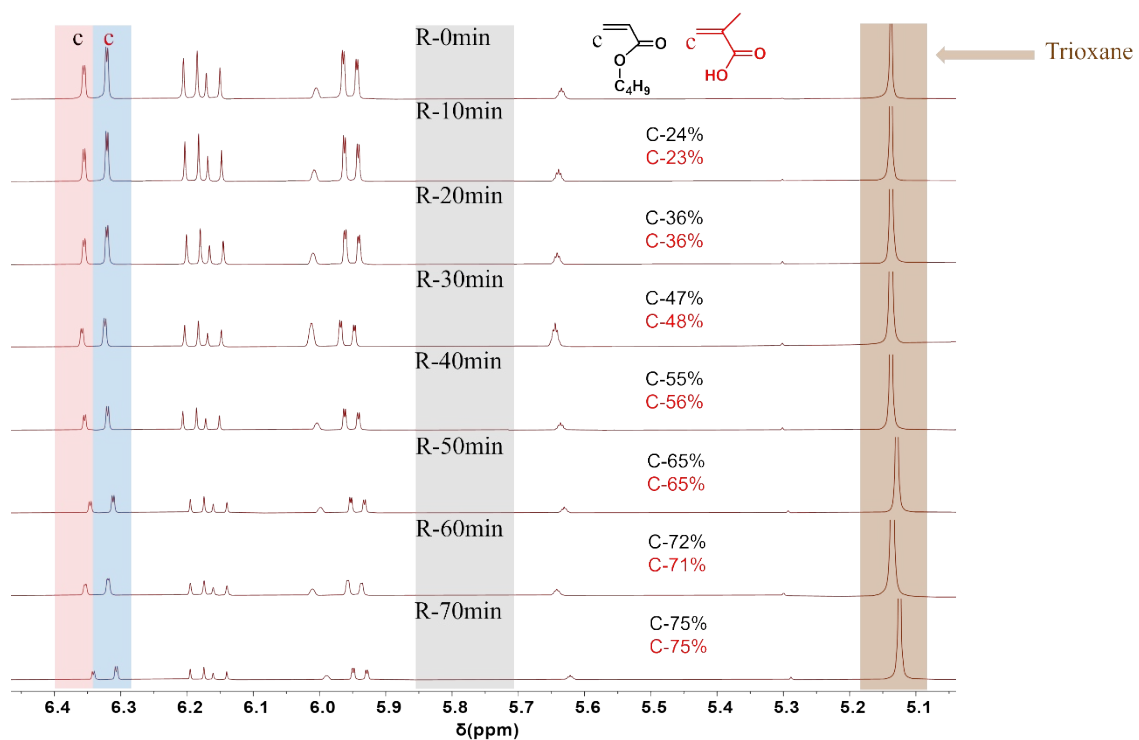

**Figure S5.** Conversion analysis by  $^1\text{H-NMR}$  (DMSO- $d_6$ ) of the polymerization of MAA and BA under control group.

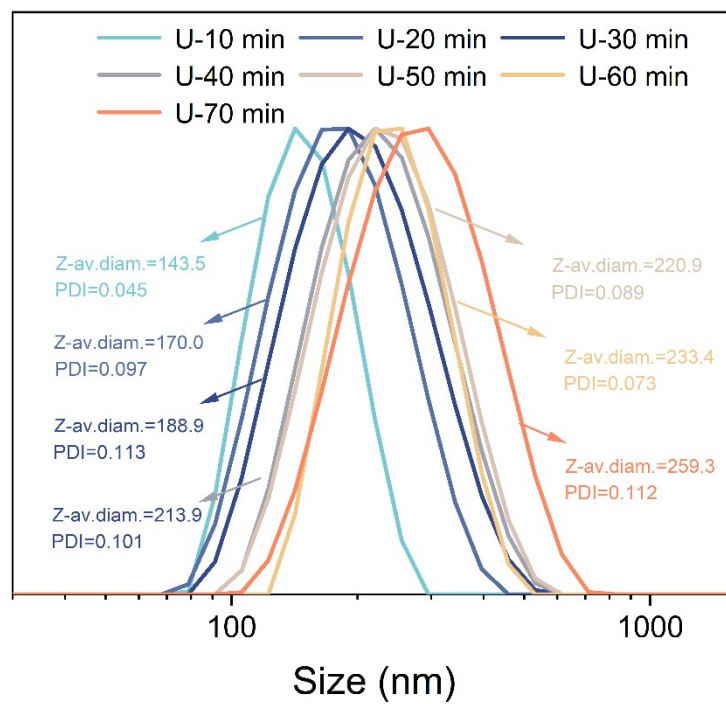

**Figure S6.** Particle size testing at different ultrasound times.



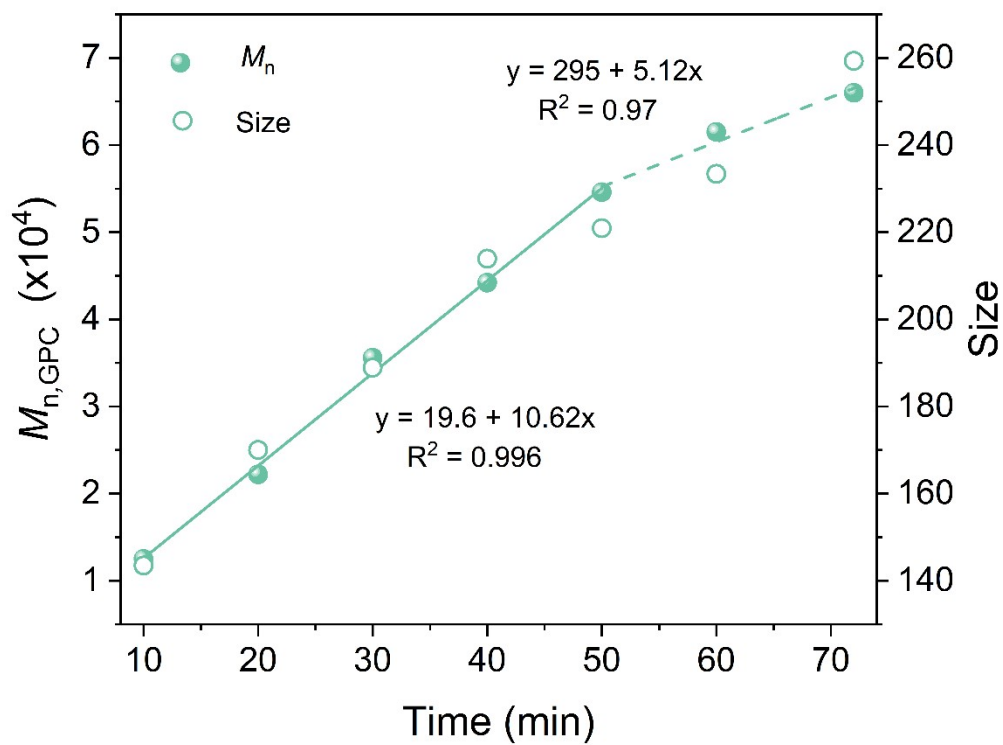

**Figure S7.** Number-average molecular weight and size of ultrasound group.

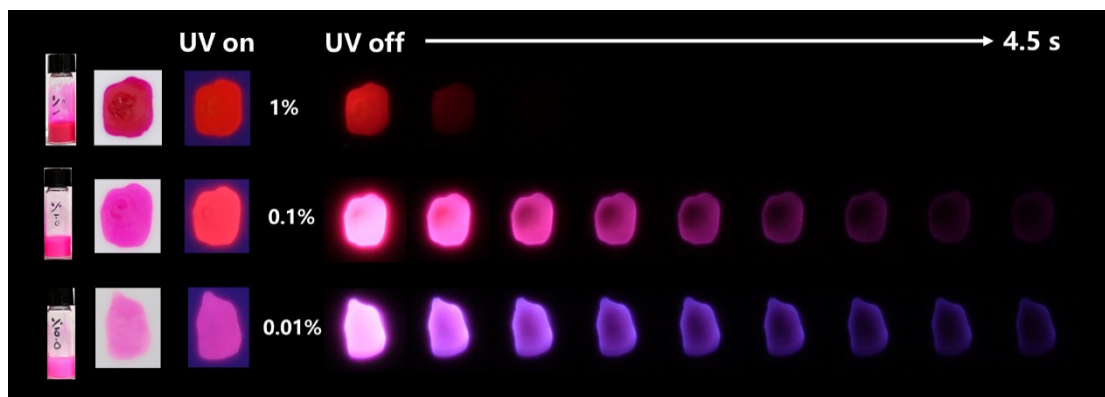

**Figure S8.** Photos of RhB/GCP with different doping concentrations under sunlight, UV irradiation, and UV off.

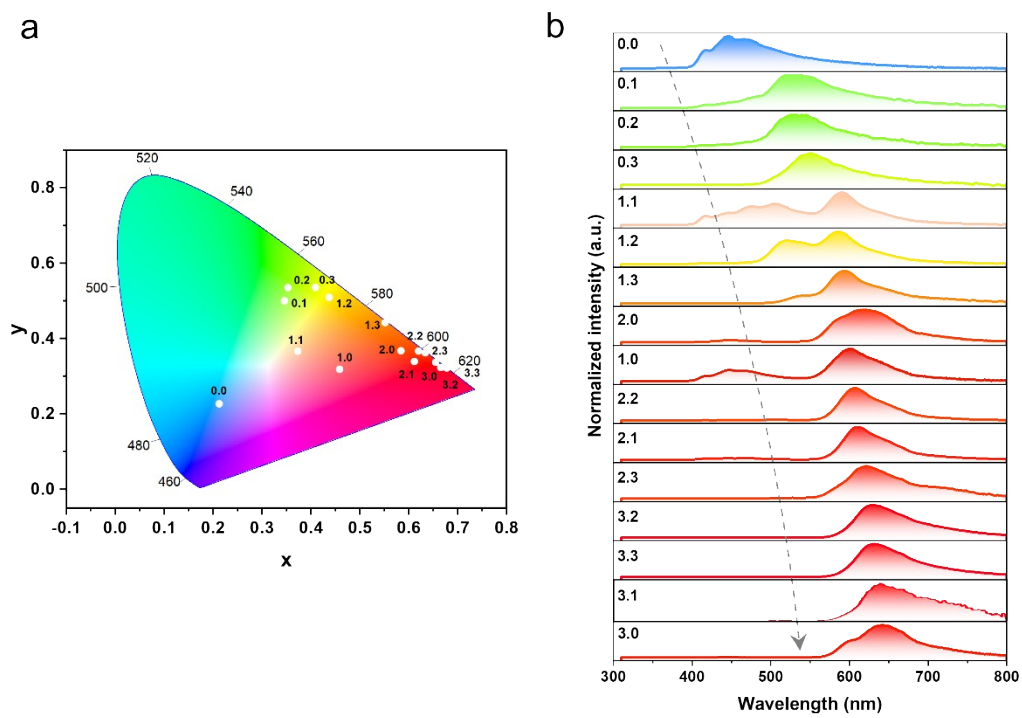

**Figure S9.** (a) CIE coordinates of afterglow luminescence of RTP materials with different doping ratios, and (b) phosphorescence spectra.

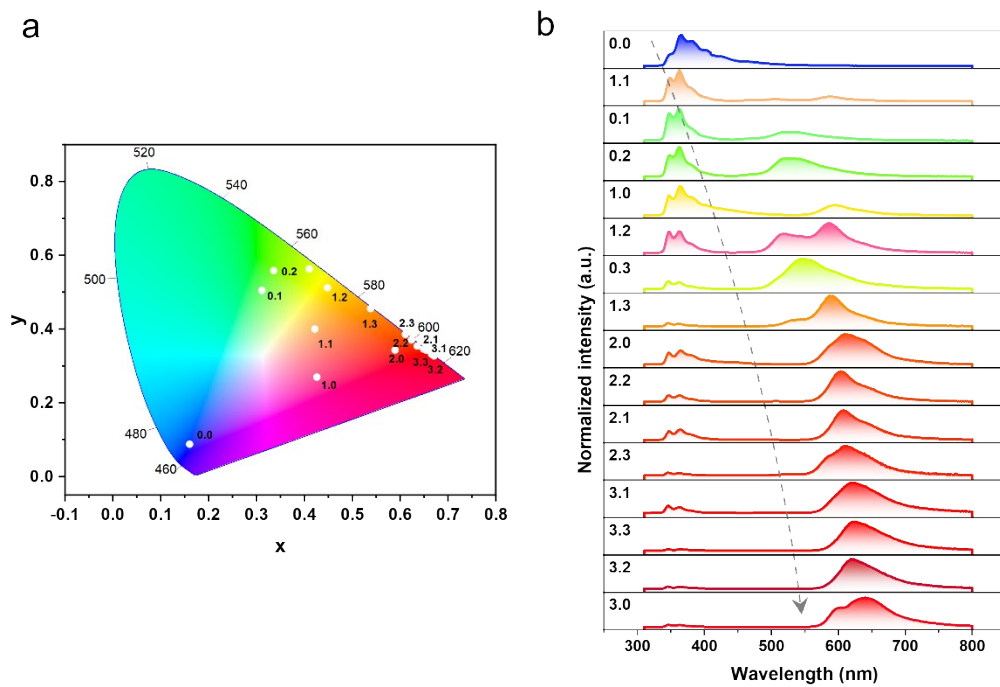

**Figure S10.** (a) CIE coordinates of afterglow luminescence of RTP materials with different doping ratios, and (b) fluorescence spectra.

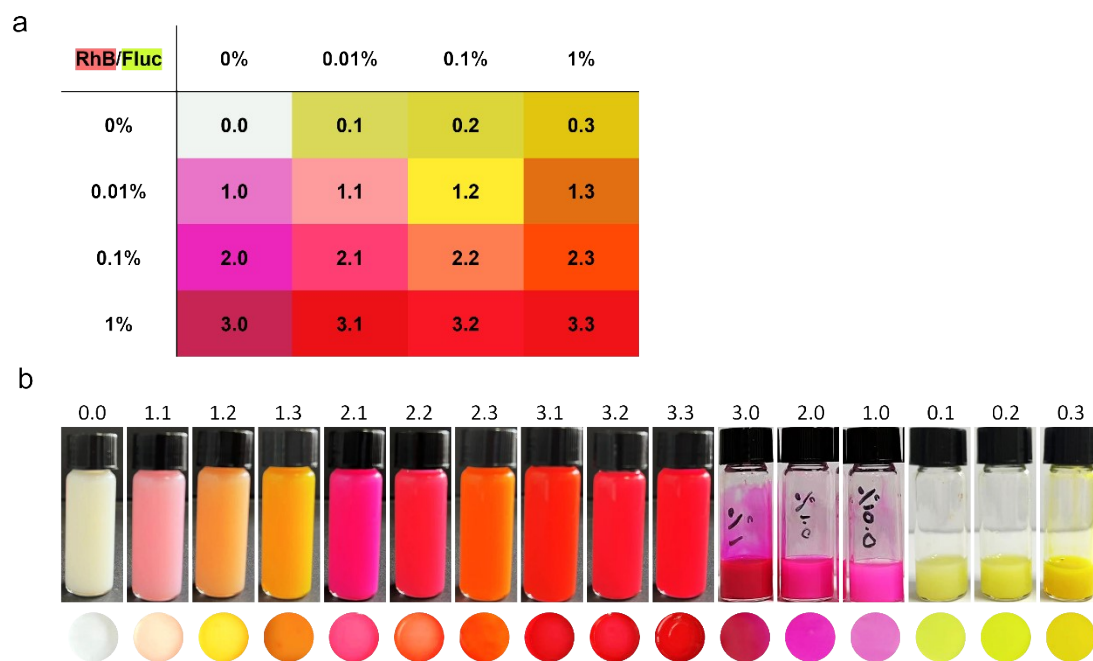

**Figure S11.** (a) RTP polymer color palette with different RhB/Fluc doping ratios. (b) RTP polymer solutions with different RhB/Fluc doping ratios (top) and thin films (bottom).

### Scheme S1. Synthesis of CTA

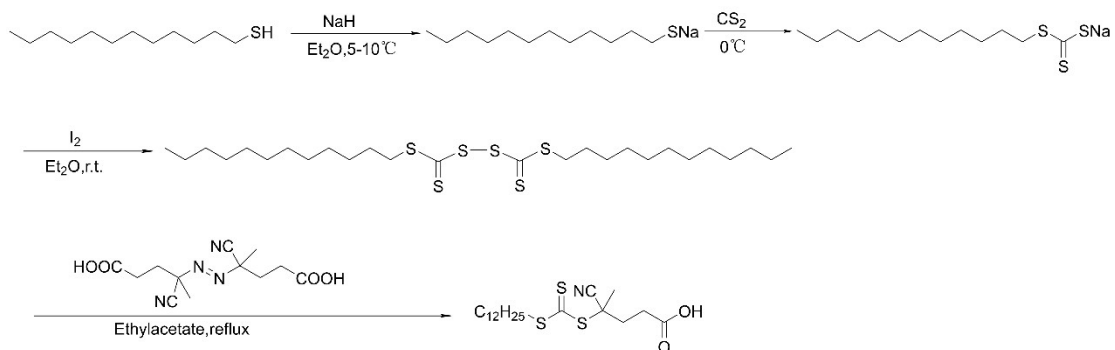

### Scheme S2. Synthesis of Cz-OH

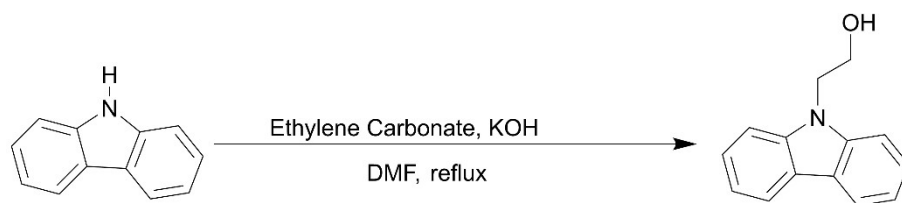

### Scheme S3. Synthesis of RAFT agents

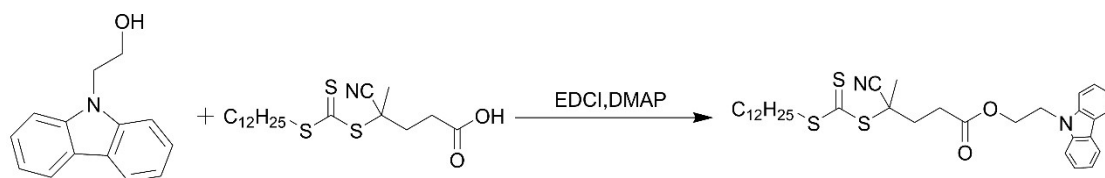

**Scheme S4.** Synthesis of GCP

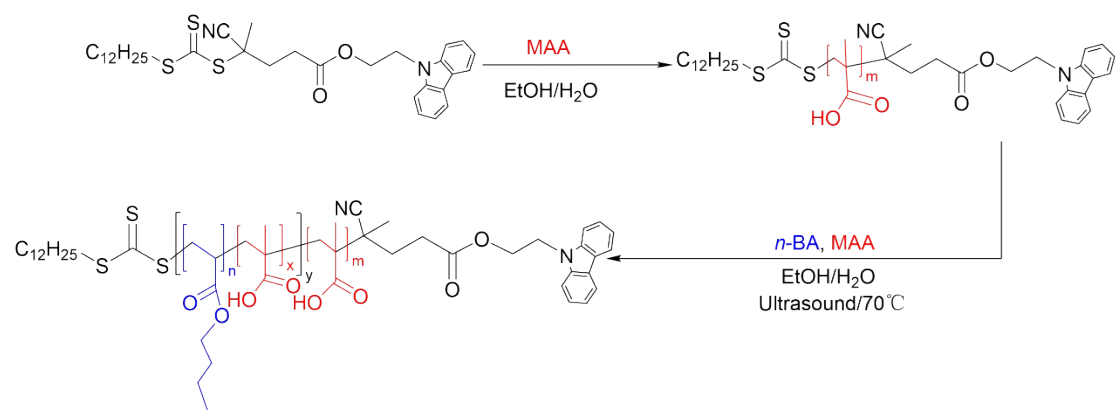

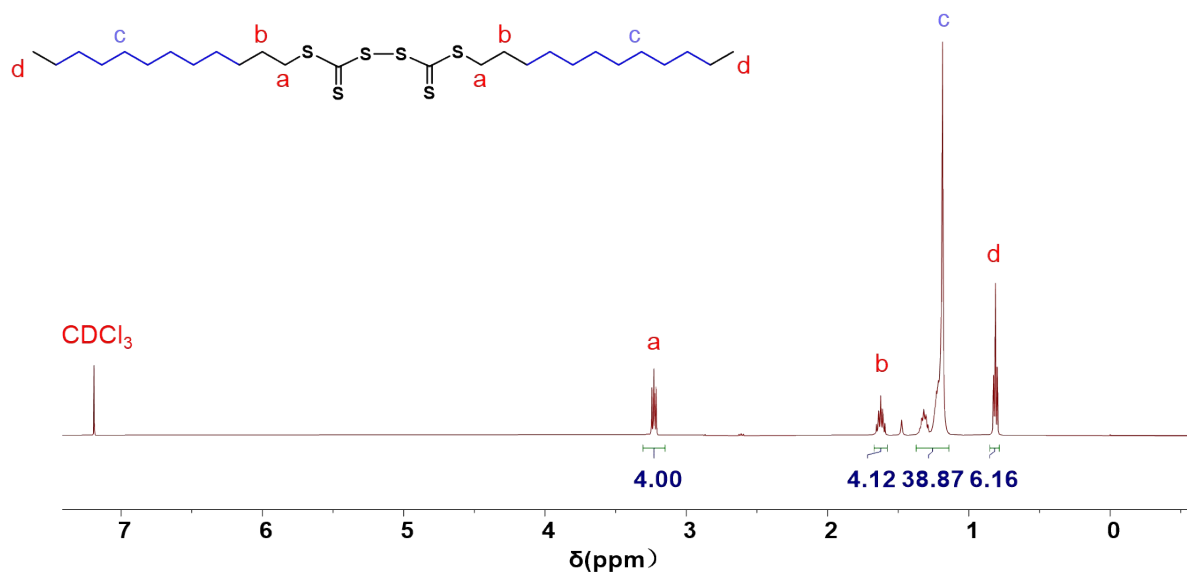

**Figure S12.** <sup>1</sup>H-NMR spectrum of the Bis-(dodecyl thioalkyl thiocarbonyl) disulfide in CDCl<sub>3</sub>.



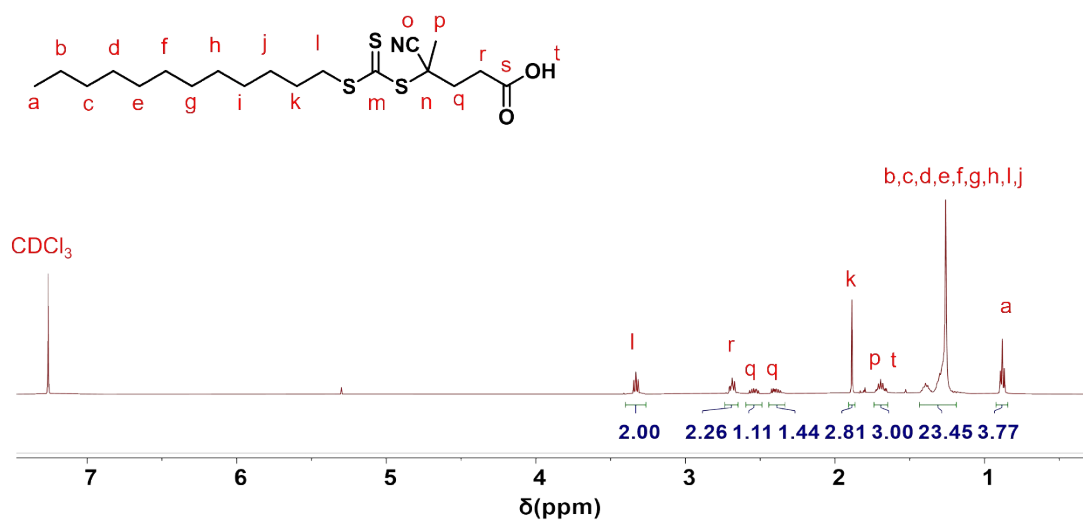

**Figure S13.** <sup>1</sup>H-NMR spectrum of the CTA in CDCl<sub>3</sub>.

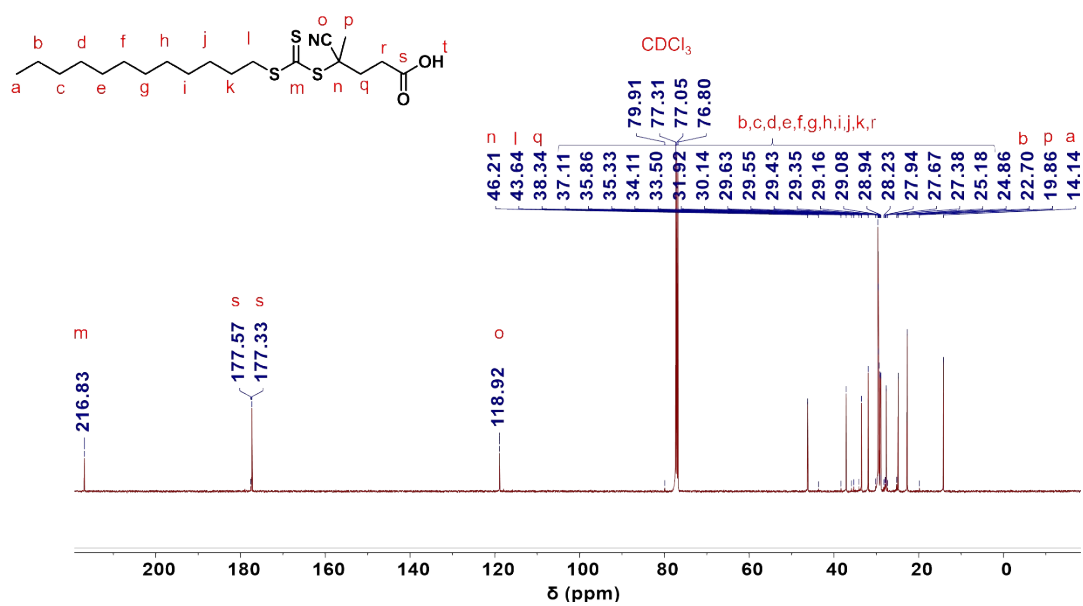

**Figure S14.**  $^{13}\text{C}$ -NMR spectrum of the CTA in  $\text{CDCl}_3$ .

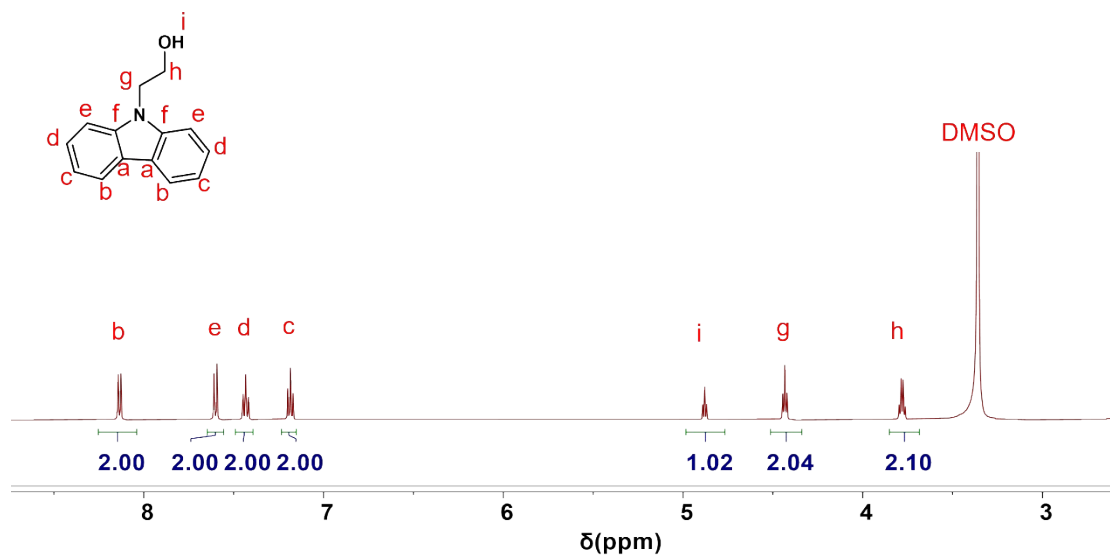

**Figure S15.** <sup>1</sup>H-NMR spectrum of Cz-OH in DMSO.

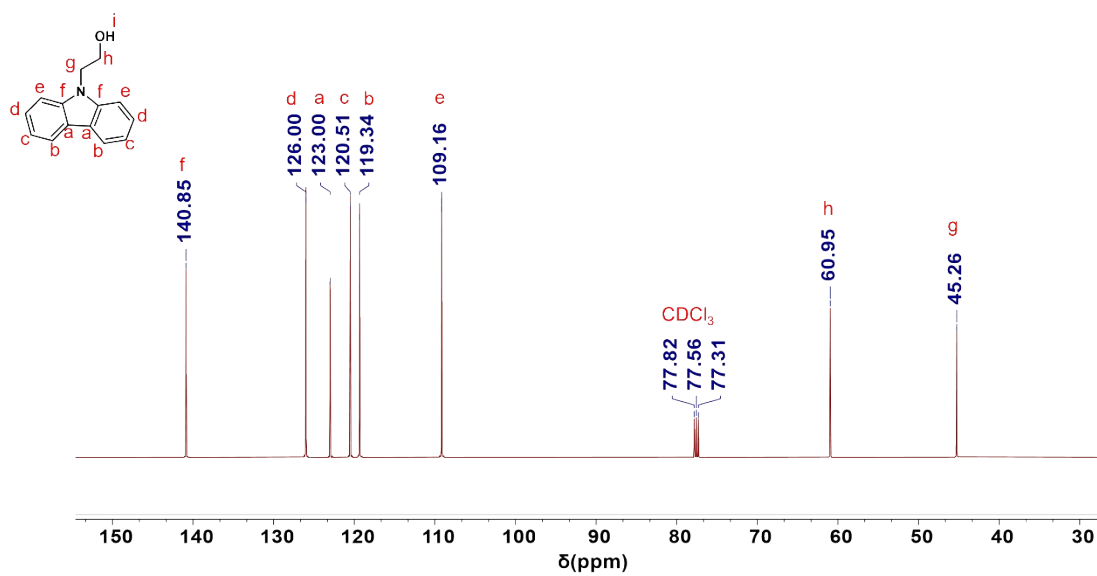

**Figure S16.** <sup>13</sup>C-NMR spectrum of Cz-OH in CDCl<sub>3</sub>.

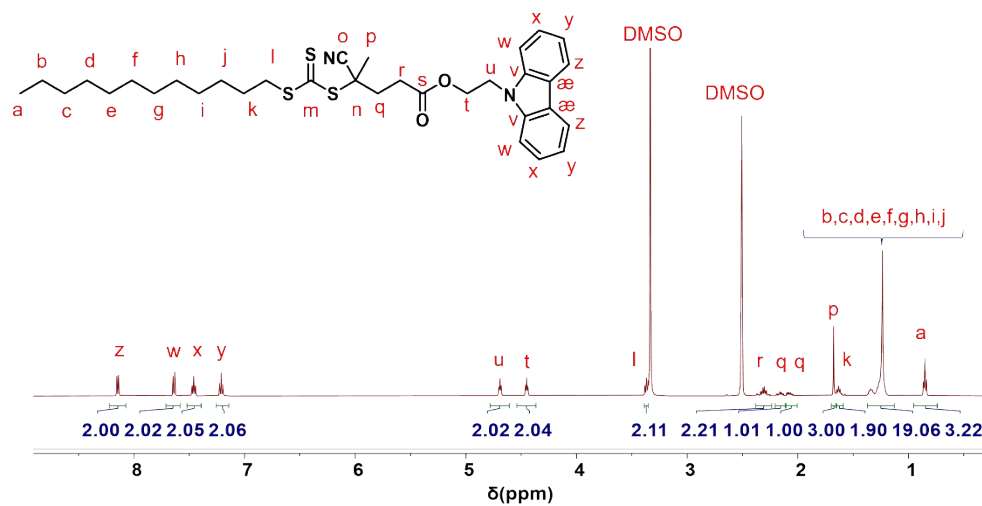

**Figure S17.** <sup>1</sup>H-NMR spectrum of RAFT agents in DMSO.

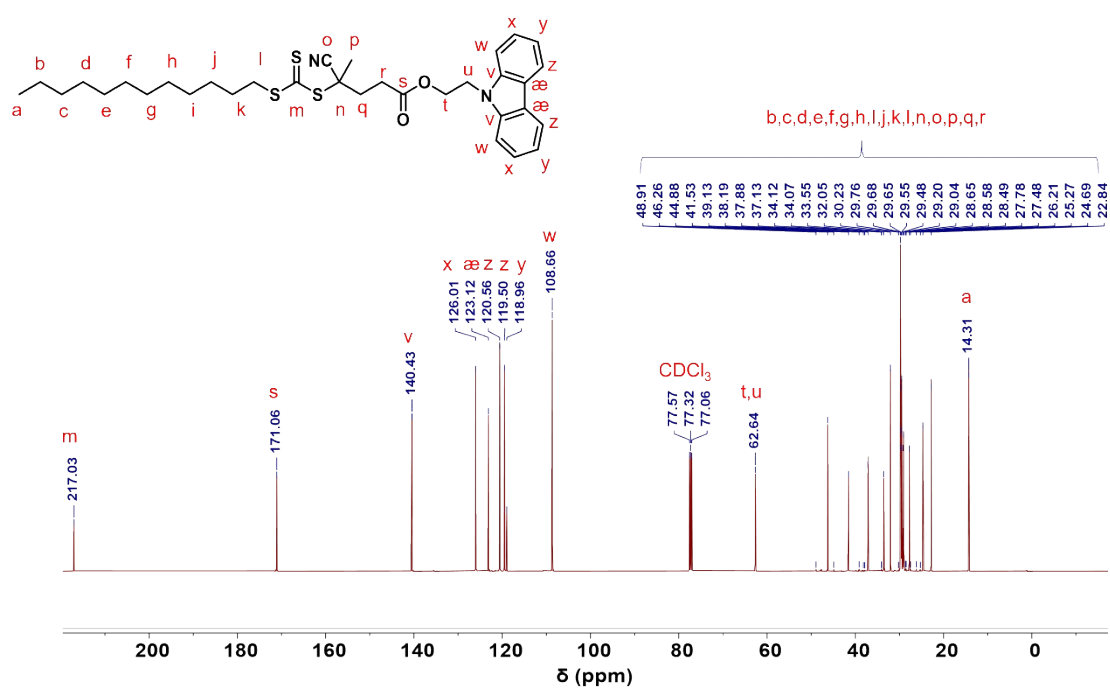

**Figure S18.** <sup>13</sup>C-NMR spectrum of RAFT agents in CDCl<sub>3</sub>.

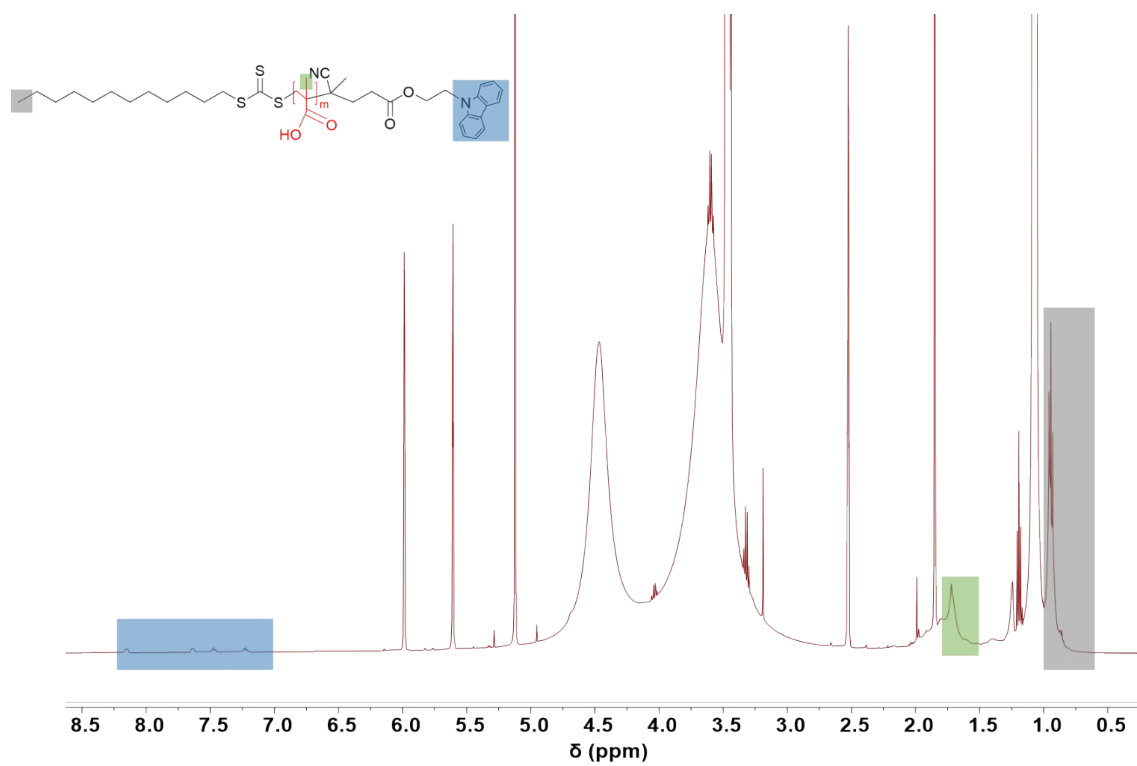

**Figure S19.**  $^1\text{H-NMR}$  spectrum of PMAA-CTA agents in DMSO.
